# Supplementary material for: Heterozygous expression of the Alzheimer’s disease protective PLCγ2 P522R variant enhances Aβ clearance while preserving synapses.
Source: Research Square preprint supplement (doi:10.21203/rs.3.rs-1420006/v1), 2022-03-25
Supplement: Supplementary file 1 [file 5be3e6d1ef0dcb3def07d15b.docx]

Supplementary Methods.

Plasmids

The pUCM-AAVS1-TO-hNGN2 construct, which was used to generate cortical neurons, was a gift from Michael Ward (Addgene plasmid #105840; http://n2t.net/addgene:105840 ; RRID:Addgene_105840). The pRR-EF1a-Puro is based on the pRR-Puro plasmid (Flemr and Buhler, 2015) and was ordered by gene synthesis (General Biosystems). The pRR-EF1a-Puro-PLCγ2_P522R plasmid was generated by annealing two oligonucleotides (supplementary Table2) containing the CRISPR target site followed by cloning in SalI and SpeI digested pRR-EF1a-Puro. The PLCγ2-P522R exchange matrix (template) was custom designed and synthesised (GeneArt, ThermoFisher), containing homology arms of 650bp upstream and downstream of the P522R conversion site. The PLCγ2WT overexpression construct pCMV6-PLCG2-Myc-DDK was purchased from Origene (RC200442). The PLCγ2P522R overexpression construct was generated using pCMV6-PLCG2-Myc-DDK, mutagenesis primers (supplementary Table2) and the Q5 site directed mutagenesis kit (E0554S, NEB), followed by transformation in DH5α chemically competent cells (ThermoFisher). The PLCγ2 control cDNA was designed with a frameshift mutation that disrupts the open reading frame followed by gene synthesis (TwistBioscience).

*Flemr, M., and Buhler, M. (2015). Single-Step Generation of Conditional Knockout Mouse Embryonic Stem Cells. Cell Rep 12, 709-716. 10.1016/j.celrep.2015.06.051.*

Supplementary Table 1: List of sequencing and cloning primers

| **GENE** | **FWD** | **REV** |
| --- | --- | --- |
| PLCG2 (Outside HA-sequencing primers) | AAAGGGGGATGTGCTGCAAGGC | GCTGTTTCCTTGCGTATTGGGCG |
| PLCG2 (Inside HA – sequencing primers) | CCTCATGGCTCTCAGACTTC | CTAGAAGAGCTAGACAAATGAAGC |
| PLCG2 (Over-expression plasmid – sequencing primers) | CGACGTCGTGCAGGCCATCAAA | TAGGAGTCGCTCCCCTCTCGCT |
| PLCG2-P522R (Mutagenesis Primers) | CAGGATATAC**g**CCCTACAGAACTAC | GGGCACTTCCTCCTCCAT |
| PRR-Puro-PLCG2 primers | TCGACCCCCTACAGAACTACATT  TTGGGGATGCAAAGCGTGATGA | CTAGTCATCACGCTTTGCATCCC  CAAAATGTAGTTCTGTAGGGGG |
| (pRR-EF1a-Puro-[R495X]) |

Supplementary Table 2: List of primary and secondary antibodies

| **Antibody** | **Host** | **Reference number** | **Manufacturer** | **Dilution** | |
| --- | --- | --- | --- | --- | --- |
| Anti PLCG2 | Mouse | sc-5283 | Santacruz | WB 1:1000 | ICC 1:200 |
| Anti TOMM20 | Rabbit | ab186735 | Abcam | WB 1:1000 |  |
| Anti-Iba1 | Rabbit | 019-19741 | Waco |  | ICC 1:500 |
| Anti TMEM119 | Rabbit | ab185333 | Abcam |  | ICC 1:200 |
| MAP2 | Chicken | ab92434 | Abcam |  | ICC 1:2000 |
| PSD95 | Mouse | MA1-045 | ThermoFisher |  | ICC 1:200 |
| Hoechst |  | 62249 | ThermoFisher |  | ICC 1:12000 |
| Anti B-Actin | Mouse | ab8226 | Abcam | WB 1:10000 |  |
| Anti B-Actin | Rabbit | ab8227 | Abcam | WB 1:10000 |  |
| Anti-Mouse-680 | Goat | 926-68070 | LICOR | WB 1:10000 |  |
| Anti-Rabbit-680 | Goat | 926-68071 | LICOR | WB 1:10000 |  |
| Anti-Mouse-800 | Goat | 926-32210 | LICOR | WB 1:10000 |  |
| Anti-Rabbit-800 | Goat | 926-32211 | LICOR | WB 1:10000 |  |
| Anti-Mouse-647 | Goat | A-21235 | ThermoFisher |  | ICC 1:500 |
| Anti-Rabbit-647 | Goat | A-27040 | ThermoFisher |  | ICC 1:500 |
| Anti-Mouse-488 | Goat | A-11001 | ThermoFisher |  | ICC 1:500 |
| Anti-Rabbit-488 | Goat | A-11008 | ThermoFisher |  | ICC 1:500 |
| Anti-Mouse-568 | Goat | A-11004 | ThermoFisher |  | ICC 1:500 |
| Anti-Rabbit-568 | Goat | A-11011 | ThermoFisher |  | ICC 1:500 |
| Anti-Chicken-568 | Goat | A-32932 | ThermoFisher |  | ICC 1:500 |

Supplementary Table 3: List of RT-qPCR Primers

| **GENE** | **FWD** | **REV** |
| --- | --- | --- |
| PLCG2 | CATCCTATATGGCACTCAGTTCG | TCCTGGTGTAAGATTTTCAAGCC |
| Plcg2 | GTGGACACCCTTCCAGAATATG | ACCTGCCGAGTCTCCATGAT |
| HEXB | GTCAGAGTGTGATGCTTTCCC | TAAACCTCGTAATGCTCCCCA |
| HK3 | GGACAGGAGCACCCTCATTTC | CCTCCGAATGGCATCTCTCAG |
| PFKFB3 | AGCCCGGATTACAAAGACTGC | GGTAGCTGGCTTCATAGCAAC |
| PFKFB1 | TACCAGAGAACGACGGTCACT | CTGCAATTATGCCAGGGTCATTA |
| TFB2M | GACCACTTACGTTCATTGACTCC | CAGGGTTTCATCATACAGCCAT |
| TSPO | TCTACTCAGCCATGGGGTAC | CAGCTGCCCAGTGTAGAGG |
| ABCA1 | AGCTACCCACCCTATGAACAAC | ACAGGGGTTGTTGGCATTAC |
| ABCA7 | GCTGCTGCTCTGGAAGAATTTC | AAGTGGCATTCATGGTGCTC |
| LIPA | TCTGGACCCTGCATTCTGAG | CACTAGGGAATCCCCAGTAAGAG |
| APOE | GTTGCTGGTCACATTCCTGG | GCAGGTAATCCCAAAAGCGAC |
| FABP5 | TGAAGGAGCTAGGAGTGGGAA | TGCACCATCTGTAAAGTTGCAG |
| PLIN2 | TTGCAGTTGCCAATACCTATGC | CCAGTCACAGTAGTCGTCACA |
| CTSB | CCCAGAGAGTTATGTTTACCG | TGGTCTCTGATCTCTTTGATG |
| CTSD | AGGGCGAGTACATGATCC | GGACAGCTTGTAGCCTTTG |
| LAMP1 | AGCTCCAAAGAAATCAAGAC | GGGTGCCACTAACACATC |
| LAMP2 | TGGTGTTGCAGCTGTTGTTG | CGCACAGCTCCCAGGACTA |
| CCLN7 | AAGGGCAATATCGACAAG | TCTATGAAAGCCACAATCAC |
| RAB7 | TGGTGTCCACGTTCTACAAGG | CCAGGGCTTCAAAAGACTCCA |
| RAB5 | CAAGGCCGACCTAGCAAATAA | GATGTTTTAGCGGATGTCTCCAT |
| CD68 | CTTCTCTCATTCCCCTATGGACA | GAAGGACACATTGTACTCCACC |
| TLR4 | AGTTGATCTACCAAGCCTTGAGT | GCTGGTTGTCCCAAAATCACTTT |
| CX3CR1 | AGTGTCACCGACATTTACCTCC | AAGGCGGTAGTGAATTTGCAC |
| P2RY12 | TTTGTGTGTCAAGTTACCTCCG | CTGGTGGTCTTCTGGTAGCG |
| NLRP3 | CCACAAGATCGTGAGAAAACCC | CGGTCCTATGTGCTCGTCA |
| CD52 | TCTTCCTCCTACTCACCATCAG | CCTCCGCTTATGTTGCTGGA |
| CD9 | TCCACTATGCGTTGAACTGCT | GGTTTCGAGTACGTCCTTCTTG |
| TREM2 | GGTCAGCACGCACAACTTG | CGCAGCGTAATGGTGAGAGT |
| TYROBP | ACTGAGACCGAGTCGCCTTAT | ATACGGCCTCTGTGTGTTGAG |
| B2M | GAGGCTATCCAGCGTACTCCA | CGGCAGGCATACTCATCTTTT |
| CD33 | GGCCACTCCAAAAACCTGAC | GACAACCAGGAGAAGATCGGG |
| C1QA | TCTGCACTGTACCCGGCTA | CCCTGGTAAATGTGACCCTTTT |
| IL1B | TTCGACACATGGGATAACGAGG | TTTTTGCTGTGAGTCCCGGAG |
| IFNγ | TCTTTGGGTCAGAGTTAAAGCCA | TTCCATCTCGGCATACAGCAA |
| IL4 | CCGTAACAGACATCTTTGCTGCC | GAGTGTCCTTCTCATGGTGGCT |
| IL6 | CCTGAACCTTCCAAAGATGGC | TTCACCAGGCAAGTCTCCTCA |
| IL10 | TCAAGGCGCATGTGAACTCC | GATGTCAAACTCACTCATGGCT |
| NF-KB | GTCAAAAACGCCACCTCTCAA | CTCGCATGGAATTTGGAACCG |
| AHR | ACATCACCTACGCCAGTCG | CGCTTGGAAGGATTTGACTTGA |
| ARNT | CTGCCAACCCCGAAATGACAT | CGCCGCTTAATAGCCCTCTG |
| AHRR | GCGCCTCAGTGTCAGTTACC | GAAGCCCAGATAGTCCACGAT |
| CYP1A1 | GGTCAGCATGTGCCCAATCA | TCGGCCACGGAGTTTCTTC |
| CYP1B1 | AAGTTCTTGAGGCACTGCGAA | GGCCGGTACGTTCTCCAAAT |
| SIRPa | GGCCTCAACCGTTACAGAGAA | GTTCCGTTCATTAGATCCAGTGT |
| CST3 | GTCGGCGAGTACAACAAAGC | CACCCCAGCTACGATCTGC |
| AIF1 | ATGAGCCAAACCAGGGATTTAC | GGGATCGTCTAGGAATTGCTTGT |
| CD14 | GACCTAAAGATAACCGGCACC | GCAATGCTCAGTACCTTGAGG |
| SPI1 | GTGCCCTATGACACGGATCTA | AGTCCCAGTAATGGTCGCTAT |
| TMEM119 | CGGCCTATTACCCATCGTCC | CTGGGCTAACAAGAGAGACCC |
| CSF1 | TGGCGAGCAGGAGTATCAC | AGGTCTCCATCTGACTGTCAAT |

Supplementary Figures


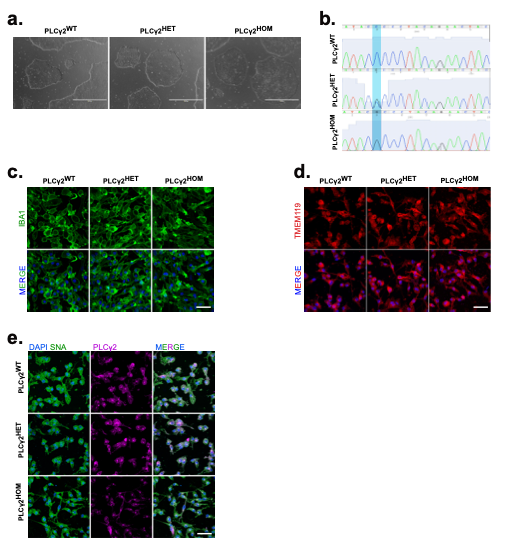


**SFig 1: Validation of PLCγ2 P522R modified iPSC derived microglia**

**a,** Representative brightfield image of healthy Bioni-10 iPSCs displaying characteristic robust colony formation. **b,** Representative sequencing trace of Bioni-10 WT, P522R heterozygote, and P522R homozygote iPSC line, highlighting a Proline (P) to Arginine (R) conversion after CRISPR editing. **c-e,** Representative confocal images of differentiated microglia expressing key microglia markers IBA1 (c) and TMEM119 (d), as well as PLCγ2 (e).

**SFig.2:** Overexpression of PLCγ2 result in increased Aβ uptake and reduced synaptosome uptake in BV2 cells.

**a-c,** Western blot (a-b) and RT-qPCR (c) analysis of PLCγ2 expression levels in BV2 cells transfected with a control, PLCγ2WT or PLCγ2P522R expression construct. Expression levels were normalised to β-actin. Data is presented as mean ± SD. Western blot data was analysed using one-way ANOVA with the Tukey multiple comparisons test, and RT-qPCR data was analysed using the Kruskal-Wallis test with Dunns multiple comparisons. **d-e,** Fluorescent confocal analysis of Aβ1-42 HyLite Fluor 647 uptake (magenta) in BV2 cells following transfection with a PLCγ2WT or PLCγ2P522R expression construct. Internalised Aβis expressed as a proportion of total cell area detected using CellBrite® (green) (Scale bar 50μM). **f-g,** Fluorescent confocal analysis of tdTomato-synaptosome uptake (red) in BV2 cells following transfection with a PLCγ2WT or PLCγ2P522R expression construct. Internalised synaptosome levels are expressed as a proportion of total cell area, detected using CellBrite® (green) (Scale bar 50μM). **h,** Representative high power confocal images of BV2 cells transfected with a control, PLCγ2WT or PLCγ2P522R expression construct and incubated with Aβ1-42-647 and synaptosomes, showing synaptosomes mainly localized to the membrane (arrows) while Aβ is fully internalised (arrowheads) (scale bar 20μm). Data is presented as mean ± SD and unless otherwise described was analysed using the Kruskal-Wallis with Dunns multiple comparisons test. (*p<0.05, **p<0.01, n=3-9).

**SFig.3:** PLCγ2 overexpression in BV2 cells affects cells size.

**a-b,** Confocal imaging of BV2 cells following transfection with a control, PLCγ2WT or PLCγ2P522R expression construct. Total cell area was visualised and quantified using CellBrite® (green). Data is presented as mean ± SD and was analysed using the Kruskal-Wallis with Dunns multiple comparisons test. (*p<0.05, **p<0.01, n=6, Scale bar 50μm).

**SFig.4:** PLCγ2 overexpression size-dependently modulates uptake of non-biological cargoes.

**a-d,** Fluorescent confocal analysis of 4kDa (a-b) or 150kDa (c-d) FITC-dextran (green) uptake byBV2 cells following transfection with a control, PLCγ2WT or PLCγ2P522R expression construct. Internalised dextran is expressed as a proportion of total cell area, detected using Wheat Germ Agglutinin (magenta). **e-f,** Fluorescent confocal analysis of Alexa FluorTM 594-zymosan A BioparticlesTM (red) uptake by BV2 cells following transfection with a PLCγ2WT or PLCγ2P522R expression construct. Internalised zymosan particles are expressed as a proportion of total cell area, detected using CellBrite® (green). All data is presented as mean ± SD and was analysed using the Kruskal-Wallis with Dunns multiple comparisons test. (*p<0.05, **p<0.01, n=3, Scale bar 50μm).

**SFig.5:** PLCγ2 modulates mitochondrial function in BV2 cells.

**a-e,** Real time oxygen consumption rate (OCR) at baseline and in response to oligomycin (ATP-synthase inhibitor), FCCP (mitochondrial membrane uncoupler) and rotenone/antimycin-A (Complex I and III inhibitors) in BV2 cells following transfection with a control, PLCγ2WT or PLCγ2P522R expression construct. Calculated basal respiration (b), maximal respiration (c) ATP production (d) and proton leak (e) are reported. Data is presented as mean ± SD and was analysed using the Kruskal-Wallis with Dunns multiple comparisons test. (*p<0.05, **p<0.01, n=3-4).

**SFig.6:** PLCγ2 modulates Ca2+ level in iPSC derived microglia.

**a,** Longitudinal assessment of Fura RedTM ratiometric analysis of bound vs. unbound Ca2+ levels in PLCγ2WT, PLCγ2HET and PLCγ2HOM hiPSC derived microglia, monitored every 10 minutes for 120 minutes. **b,** Mean Ca2+ intensity across the whole 2h period. All data is presented as mean ± SD and was analysed using the Kruskal-Wallis with Dunns multiple comparisons test. (*p<0.05, **p<0.01, n=3).
